# Supplementary material for: New Method of Isothermal, Hairpin Assisted, Primer Independent Amplification of DNA
Source: MDPI journal article supplement (doi:10.3390/biochem3030010), 2023-09-19
Supplement: s1 [file s1]

**Table S1.** Sequence of DNA amplicon and primers.

|                 |                                                                                                                                                               |
|-----------------|---------------------------------------------------------------------------------------------------------------------------------------------------------------|
| d161-AT         | (TA) <sub>15</sub> GACTCCATGAAGACCTCACAGTAAAAATAGGTGATTTTGGTCTAGCTACAGTGAAATCTCGATGGAGTGGGTCCCATCAGTTTGAACAGTTGTCTGGAGTC (TA) <sub>15</sub>                   |
| d157-GTAC       | (GTAC) <sub>7</sub> GACTCCATGAAGACCTCACAGTAAAAATAGGTGATTTTGGTCTAGCTACAGTGAAATCTCGATGGAGTGGGTCCCATCAGTTTGAACAGTTGTCTGGAGTC (GTAC) <sub>7</sub>                 |
| d158            | GATCTACTGTTTTCTTTACTTACTACACCTCAGATATATTTCTTCATGAAGACCTCACAGTAAAAATAGGTGATTTTGGTCTAGCTACAGTGAAATCTCGATGGAGTGGGTCCCATCAGTTTGAACAGTTGTCTGGATCCATTTTGTGGATGGTAAG |
| d153-LAMP       | TACACCTCAGATATATTTCTTCATGAAGACCTCACAGTAAAAATAGGTGATTTTGGTCTAGCTACAGTGAAATCTCGATGGAGTGGGTCCCATCAGTTTGAACAGTTGTCTGGATCCATTTTGTGGATGGTAAGAATTGAGGCTATTTTTCC      |
| 24-F3c-P        | [P] GATCTACTGTTTTCTTTACTTAC                                                                                                                                   |
| 20-B3c-P        | [P] AGGGCCAAAAATTTAATCAG                                                                                                                                      |
| 49-FIP          | ACTGTAGCTAGACCAAAATCACCATACACCTCAGATATATTTCTTCATG                                                                                                             |
| 46-BIP          | TGAAATCTCGATGGAGTGGGTCCGGAATAAGCCTCAATTCTTAC                                                                                                                  |
| 59-HAIR(AT)-F   | (TA) <sub>15</sub> GACTCCATGAAGACCTCACAGTAAAAATA                                                                                                              |
| 56-HAIR(AT)-R   | (TA) <sub>15</sub> GACTCCAGACAACCTGTTCAAACCTGAT                                                                                                               |
| 57-HAIR(GTAC)-F | (GTAC) <sub>7</sub> GACTCCATGAAGACCTCACAGTAAAAATA                                                                                                             |
| 54-HAIR(GTAC)-R | (GTAC) <sub>7</sub> GACTCCAGACAACCTGTTCAAACCTGAT                                                                                                              |
